# Supplementary material for: Construction of Drought Stress Regulation Networks in Potato Based on SMRT and RNA Sequencing Data
Source: Research Square preprint supplement (doi:10.21203/rs.3.rs-1456188/v1), 2022-03-22
Supplement: Supplementary file 1 [file f3317ee26817e551364da089.xlsx]

## Sheet: Sheet1
Table S2. Statistics of the number of differentially expressed genes
DEG set	DEG Number	up-regulated	down-regulated
DCK1_DCK2_DCK3_vs_D12h1_D12h2_D12h3	5941	2401	3540
DCK1_DCK2_DCK3_vs_D1h1_D1h2_D1h3	1069	829	240
DCK1_DCK2_DCK3_vs_D24h1_D24h2_D24h3	7420	3172	4248
DCK1_DCK2_DCK3_vs_D3h1_D3h2_D3h3	4747	2569	2178
DCK1_DCK2_DCK3_vs_D48h1_D48h2_D48h3	6037	2611	3426
DCK1_DCK2_DCK3_vs_D6h1_D6h2_D6h3	6423	2768	3655
